# Supplementary material
Source: PubMed Central journal article supplement (PMC10009699)
Supplement: 00575-2022.tableS2.pdf [file 00575-2022.tableS2.pdf]

**Table S2a.** Multivariable ordinal logistic mixed model analysis of self-reported dyspnoea by the modified Medical Research Council score at follow-up visits after discharge from hospital for COVID-19, presented with odds ratio (95%CI) for being in a higher category of dyspnoea, with all covariates.

| mMRC (0, 1, $\geq 2$ )   | Pts./obs.<br>239/415 | Odds ratio (95% CI) |
|--------------------------|----------------------|---------------------|
| 12 months vs. 3 months   |                      | 0.76 (0.48, 1.21)   |
| WHO group 4 vs group 3   |                      | 0.63 (0.27, 1.48)   |
| WHO group 5-7 vs group 3 |                      | 0.75 (0.25, 2.30)   |
| Male sex vs female       |                      | 0.33 (0.15-0.74)    |
| Age, per year            |                      | 1.01 (0.99-1.04)    |

mMRC, modified Medical Research Council Dyspnoea scale. CI, Confidence interval. WHO, World Health Organisation. WHO group 3: hospitalised, no oxygen therapy. WHO group 4: need for supplemental oxygen by mask or nasal prongs. WHO group 5-7: need for non-invasive ventilation support, mechanical ventilation and/or additional organ support.

**Table S2b.** Multivariable linear mixed model analysis for exercise capacity (6MWD) at follow-up visits after discharge from hospital for COVID-19, presented with beta coefficient (95%CI). With all covariates.

| 6MWD, m                                         | Pts./obs.<br>158/283 | Beta coefficient (95% CI) |
|-------------------------------------------------|----------------------|---------------------------|
| 12 months vs. 3 months                          |                      | 6 (-7, 19)                |
| WHO group 4 vs group 3                          |                      | -31 (-63, 0)              |
| WHO group 5-7 vs group 3                        |                      | -33 (-76, 10)             |
| Male sex vs female                              |                      | 88 (59, 116)              |
| Age, per year                                   |                      | -3 (-3, -1)               |
| BMI, per kg/m <sup>2</sup>                      |                      | -6 (-10, -3)              |
| Charlson comorbidity index, score 1 vs 0        |                      | -58 (-96, -21)            |
| Charlson comorbidity index, score $\geq 2$ vs 0 |                      | -31 (-79, 18)             |

6MWD, 6-minute walking distance. CI, Confidence interval. WHO, World Health Organisation. WHO group 3: hospitalised, no oxygen therapy. WHO group 4: need for supplemental oxygen by mask or nasal prongs. WHO group 5-7: need for non-invasive ventilation support, mechanical ventilation and/or additional organ support. BMI, Body mass index.

**Table S2c.** Multivariable linear mixed model analysis for forced vital capacity at follow-up visits after discharge from hospital for COVID-19, presented with beta coefficient (95%CI). With all covariates.

| FVC, L                                          | Pts./obs.<br>197/369 | Beta coefficient (95% CI) |
|-------------------------------------------------|----------------------|---------------------------|
| 12 months vs. 3 months                          |                      | 0.02 (-0.03, 0.08)        |
| WHO group 4 vs group 3                          |                      | -0.18 (-0.41, 0.05)       |
| WHO group 5-7 vs group 3                        |                      | -0.23 (-0.54, 0.08)       |
| Male sex vs female                              |                      | 1.45 ( 1.25, 1.66)        |
| Age, per year                                   |                      | -0.02 (-0.03, -0.01)      |
| BMI, per kg/m <sup>2</sup>                      |                      | -0.02 (-0.05, 0.00)       |
| Charlson comorbidity index, score 1 vs 0        |                      | -0.28 (-0.56, 0.00)       |
| Charlson comorbidity index, score $\geq 2$ vs 0 |                      | -0.12 (-0.47, 0.22)       |

FVC, Forced vital capacity. CI, Confidence interval. WHO, World Health Organisation. WHO group 3: hospitalised, no oxygen therapy. WHO group 4: need for supplemental oxygen by mask or nasal prongs. WHO group 5-7: need for non-invasive ventilation support, mechanical ventilation and/or additional organ support. BMI, Body mass index.

**Table S2d.** Multivariable linear mixed model analysis for diffusion capacity of the lungs for carbon monoxide at follow-up visits after discharge from hospital for COVID-19, presented with beta coefficient (95%CI). With all covariates.

| DL <sub>CO</sub> , mmol/min/kPa                 | Pts./obs.<br>194/363 | Beta coefficient (95% CI) |
|-------------------------------------------------|----------------------|---------------------------|
| 12 months vs. 3 months                          |                      | 0.28 (0.12, 0.44)         |
| WHO group 4 vs group 3                          |                      | -0.57 (-1.00, -0.14)      |
| WHO group 5-7 vs group 3                        |                      | -1.18 (-1.75, -0.61)      |
| Male sex vs female                              |                      | 2.73 (2.35, 3.11)         |
| Age, per year                                   |                      | -0.05 (-0.07, -0.04)      |
| BMI, per kg/m <sup>2</sup>                      |                      | 0.02 (-0.03, 0.06)        |
| Charlson comorbidity index, score 1 vs 0        |                      | -0.35 (-0.87, 0.17)       |
| Charlson comorbidity index, score $\geq 2$ vs 0 |                      | -0.62 (-1.26, 0.01)       |

DL<sub>CO</sub>, Diffusion capacity of the lungs for carbon monoxide. CI, Confidence interval. WHO, World Health Organisation. WHO group 3: hospitalised, no oxygen therapy. WHO group 4: need for supplemental oxygen by mask or nasal prongs. WHO group 5-7: need for non-invasive ventilation support, mechanical ventilation and/or additional organ support. BMI, Body mass index.

**Table S2e.** Multivariable linear mixed model analysis for lung capacity at follow-up visits after discharge from hospital for COVID-19, presented with beta coefficient (95%CI). With all covariates.

| TLC, L                                          | Pts./obs.<br>175/324 | Beta coefficient (95% CI) |
|-------------------------------------------------|----------------------|---------------------------|
| 12 months vs. 3 months                          |                      | 0.13 (0.02, 0.24)         |
| WHO group 4 vs group 3                          |                      | -0.57 (-0.96, -0.17)      |
| WHO group 5-7 vs group 3                        |                      | -0.84 (-1.36, -0.32)      |
| Male sex vs female                              |                      | 1.91 (1.56, 2.27)         |
| Age, per year                                   |                      | 0.01 (-0.00, 0.03)        |
| BMI, per kg/m <sup>2</sup>                      |                      | -0.02 (-0.06, 0.02)       |
| Charlson comorbidity index, score 1 vs 0        |                      | -0.14 (-0.62, 0.33)       |
| Charlson comorbidity index, score $\geq 2$ vs 0 |                      | 0.21 (-0.40, 0.82)        |

TLC, Total lung capacity. CI, Confidence interval. WHO, World Health Organisation. WHO group 3: hospitalised, no oxygen therapy. WHO group 4: need for supplemental oxygen by mask or nasal prongs. WHO group 5-7: need for non-invasive ventilation support, mechanical ventilation and/or additional organ support. BMI, Body mass index.
